# Supplementary material
Source: PubMed Central journal article supplement (PMC6086350)

# Supplementary Figure 1

A

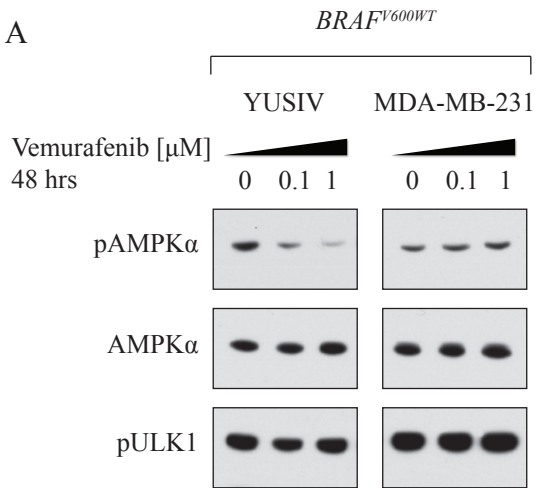

B

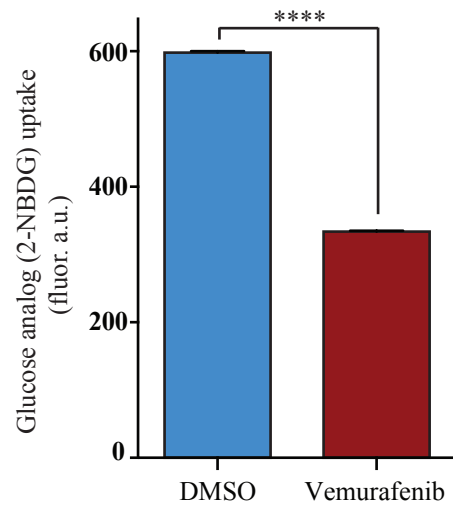

Supplementary Figure 2

A

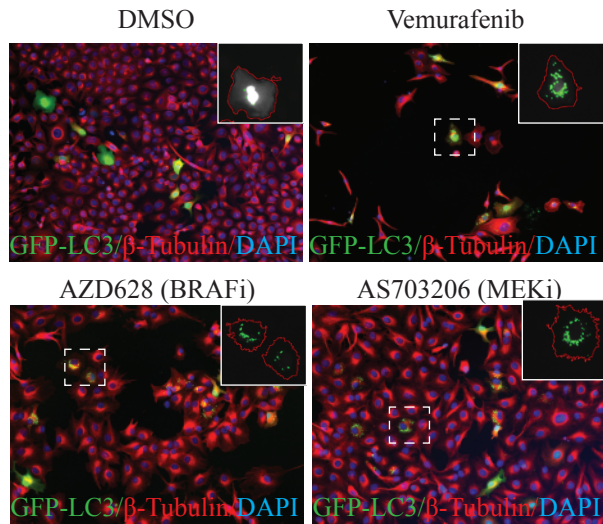

C

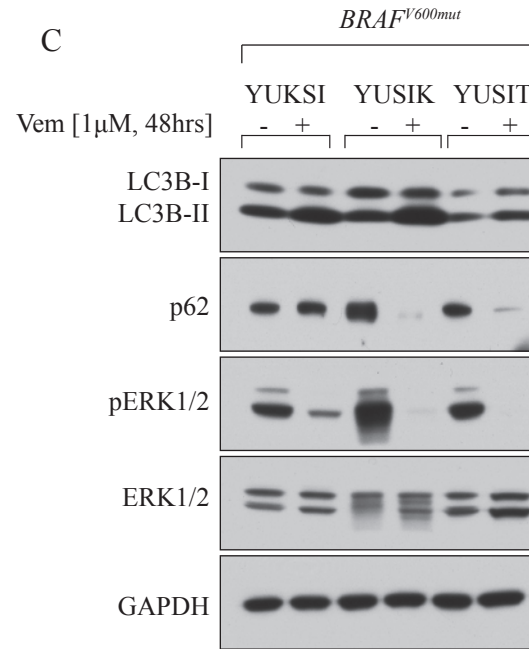

D

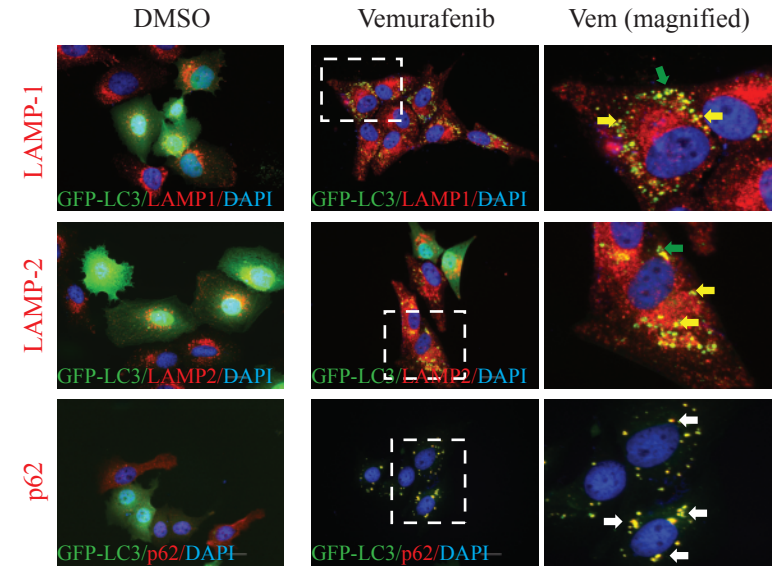

B

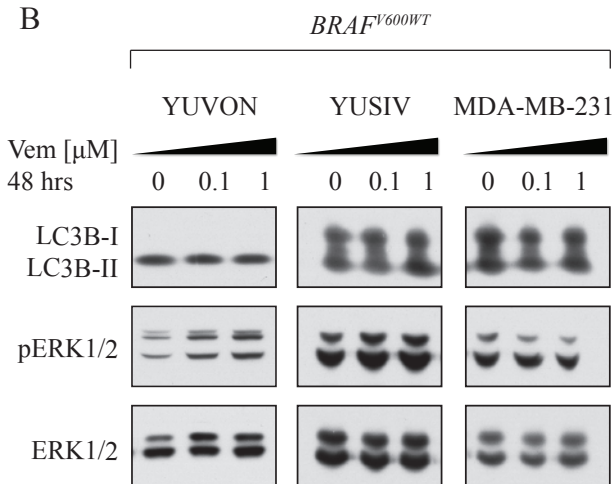

E

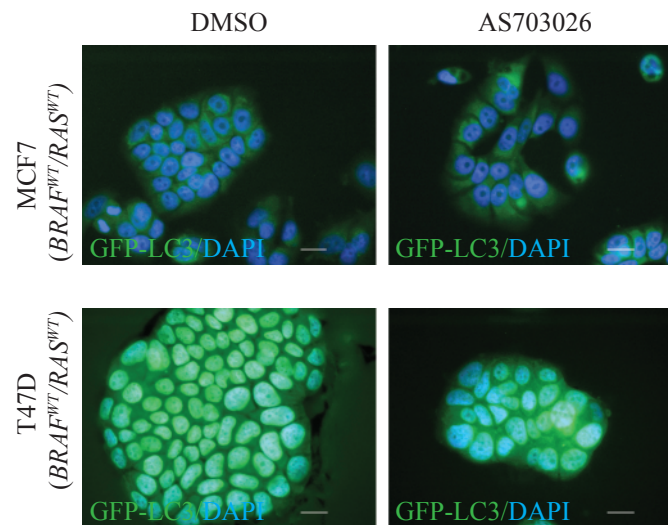

F

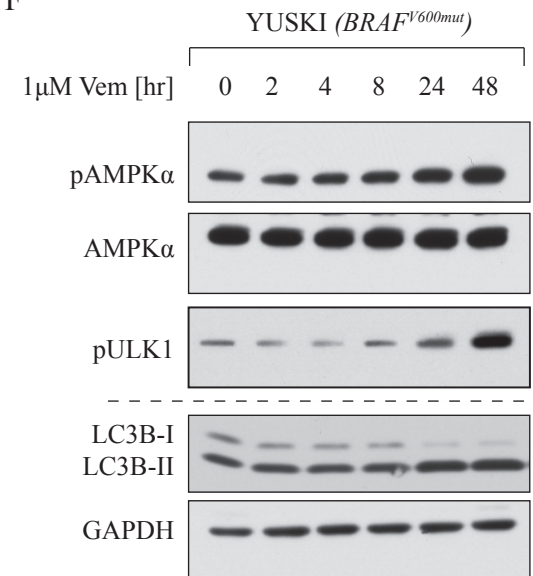

# Supplementary Figure 3

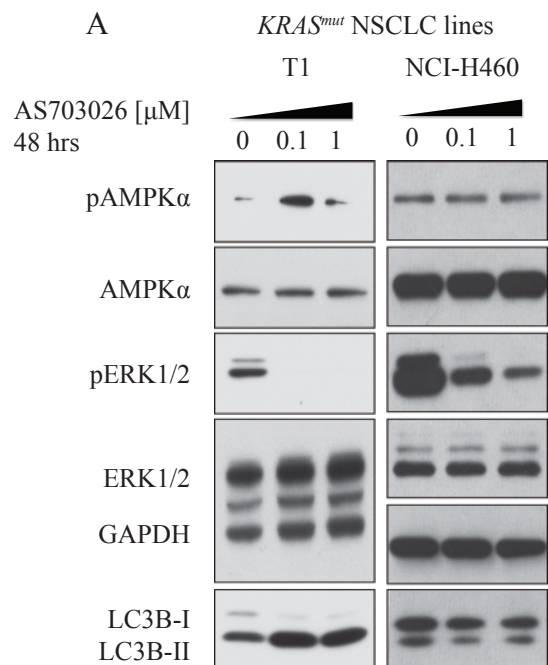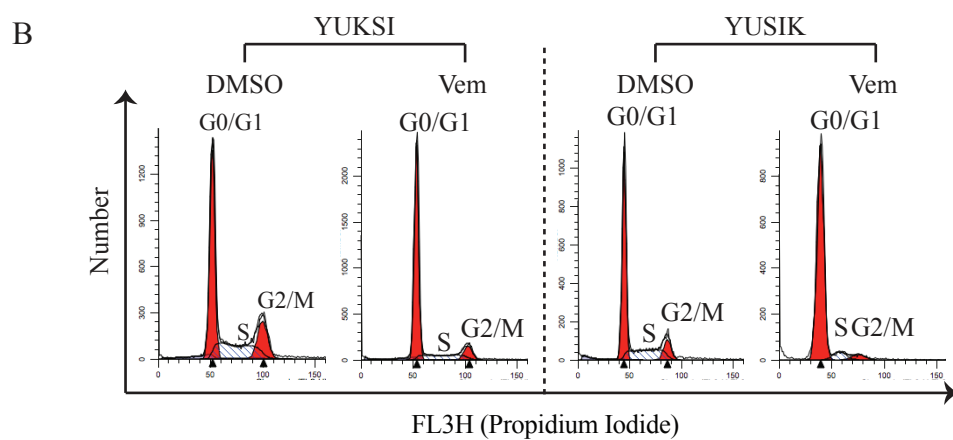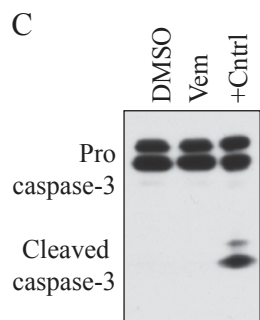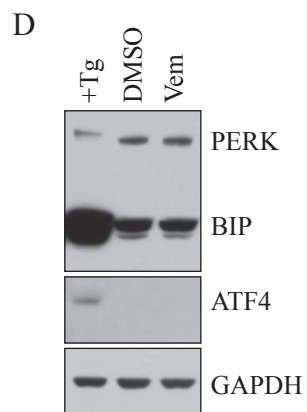

Supplement: NIHMS984206-supplement-1-3.pdf [file NIHMS984206-supplement-1-3.pdf]

Supplementary Figure 4

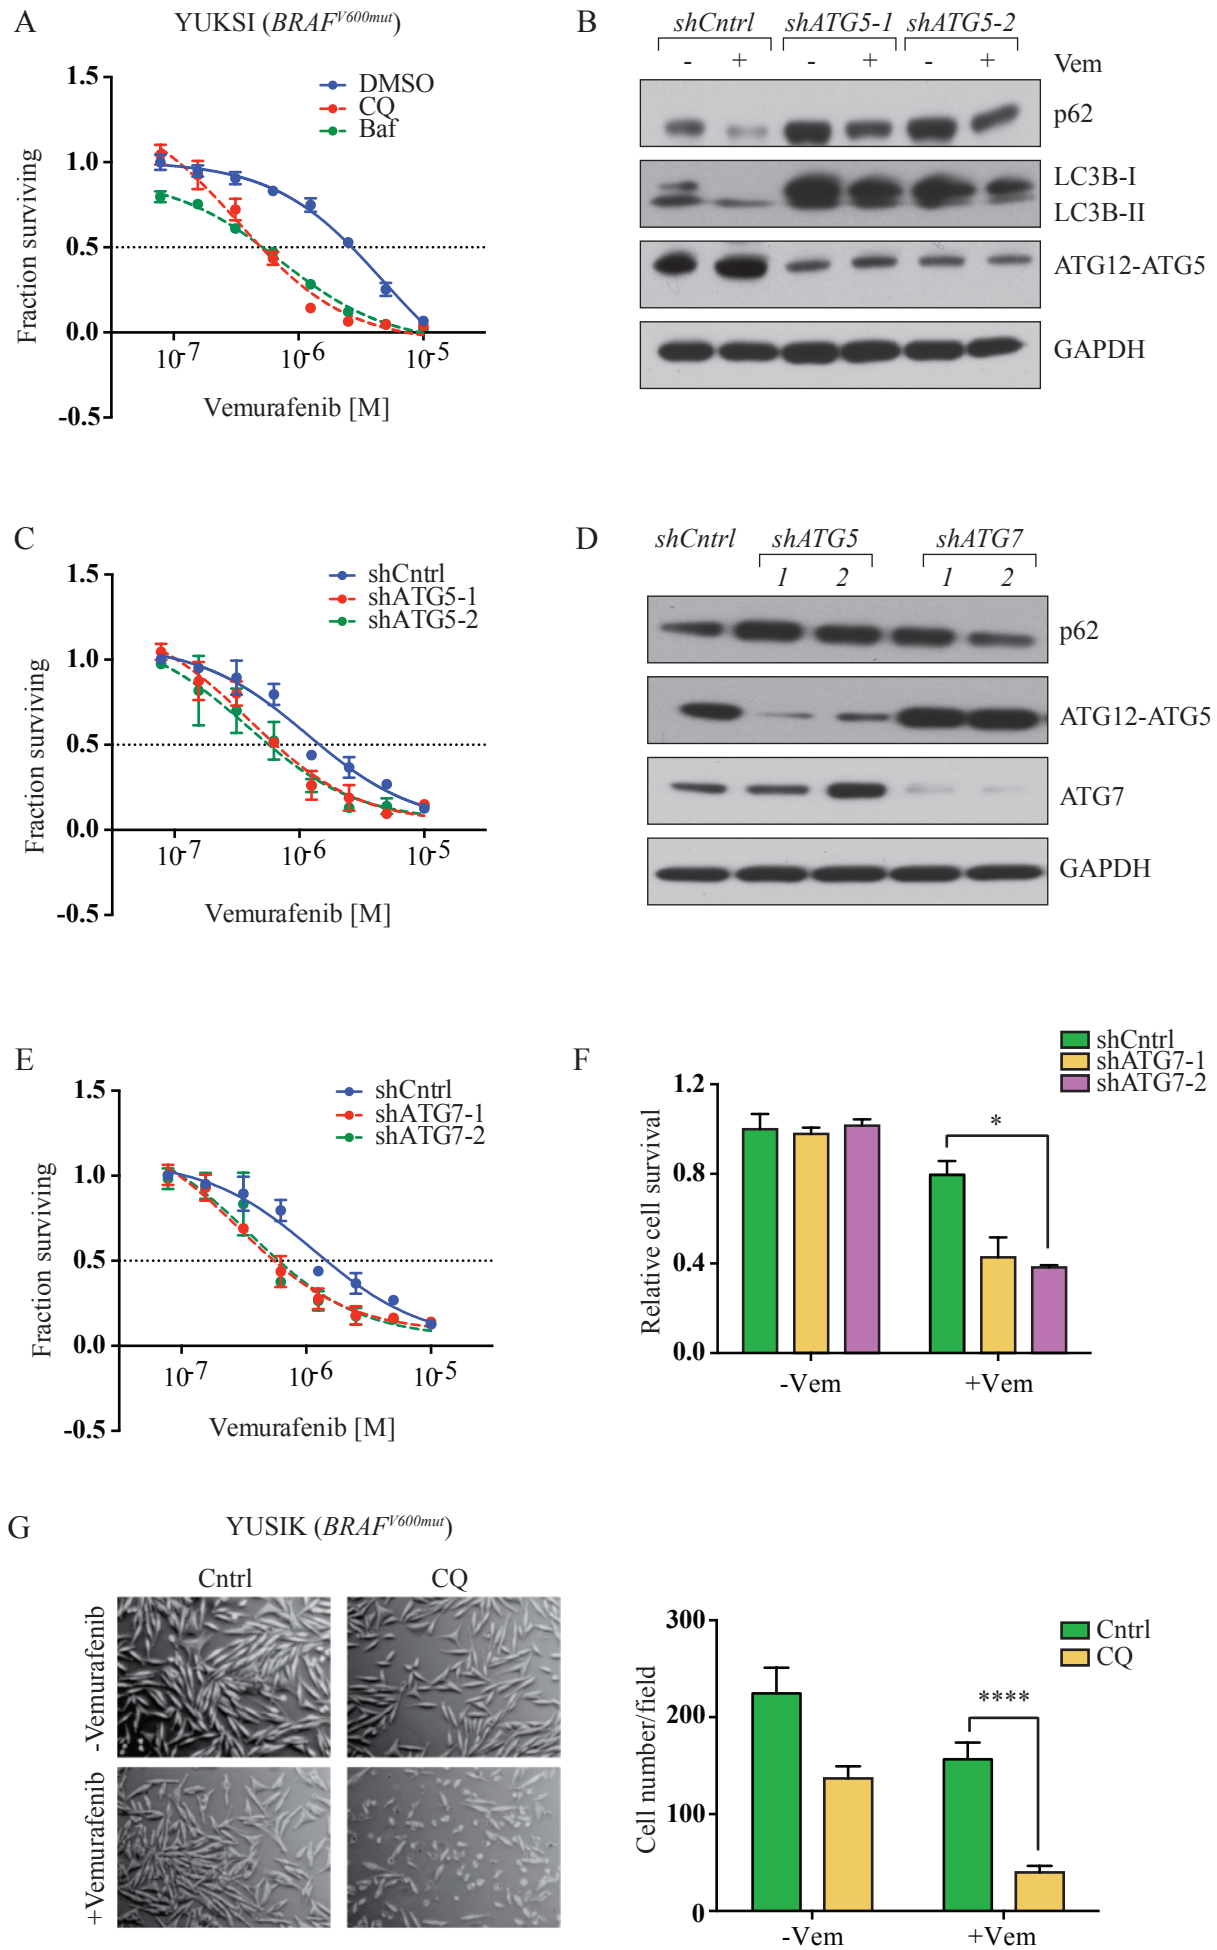

# Supplementary Figure 5

A

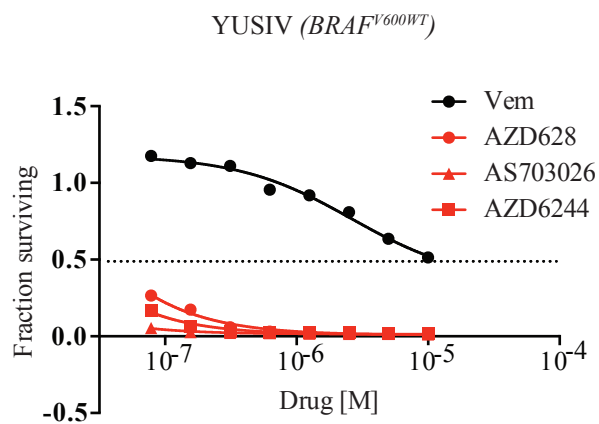

B

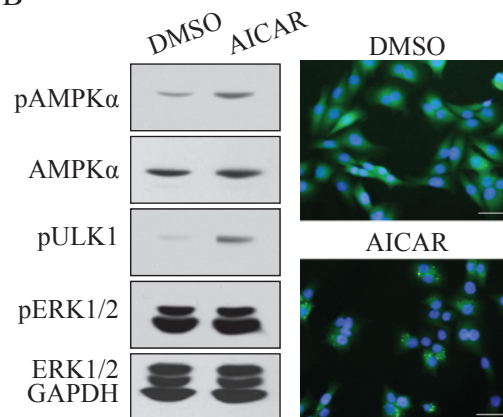

C

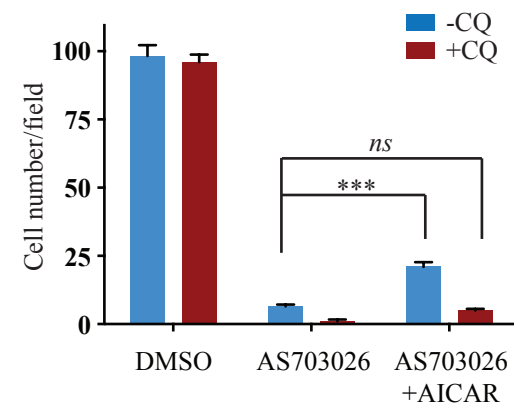

D

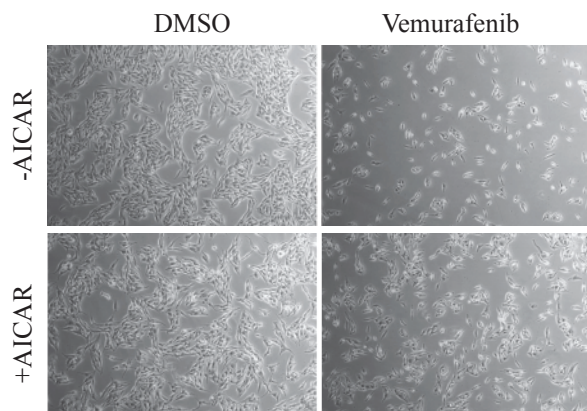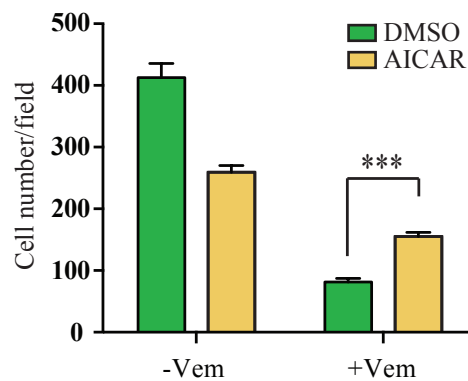

E

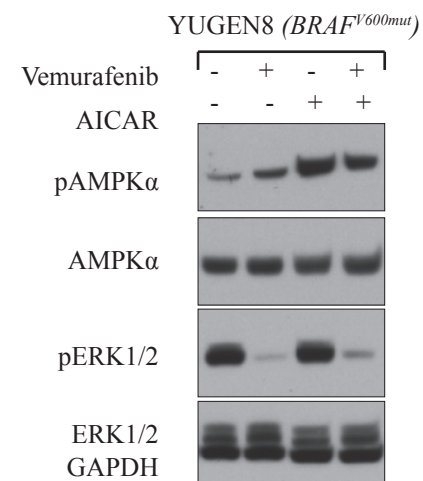

# Supplementary Figure 6

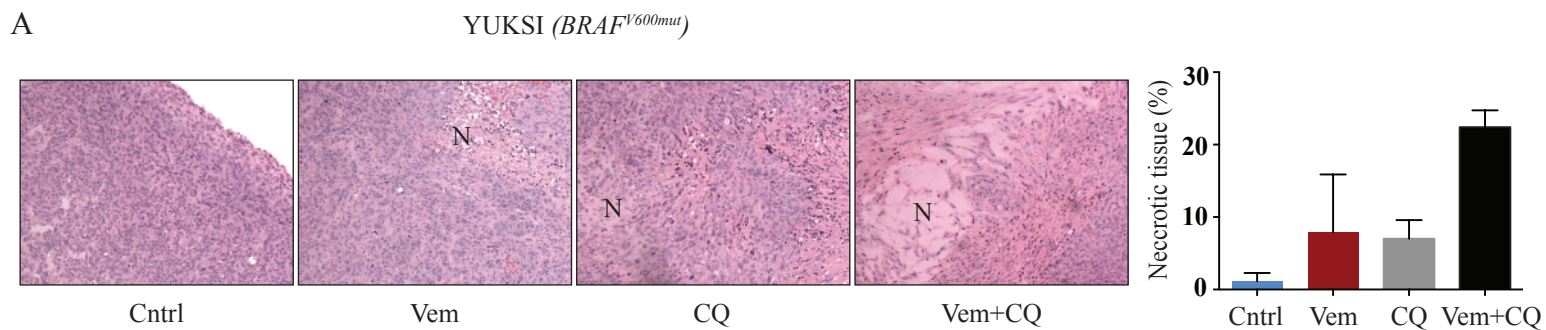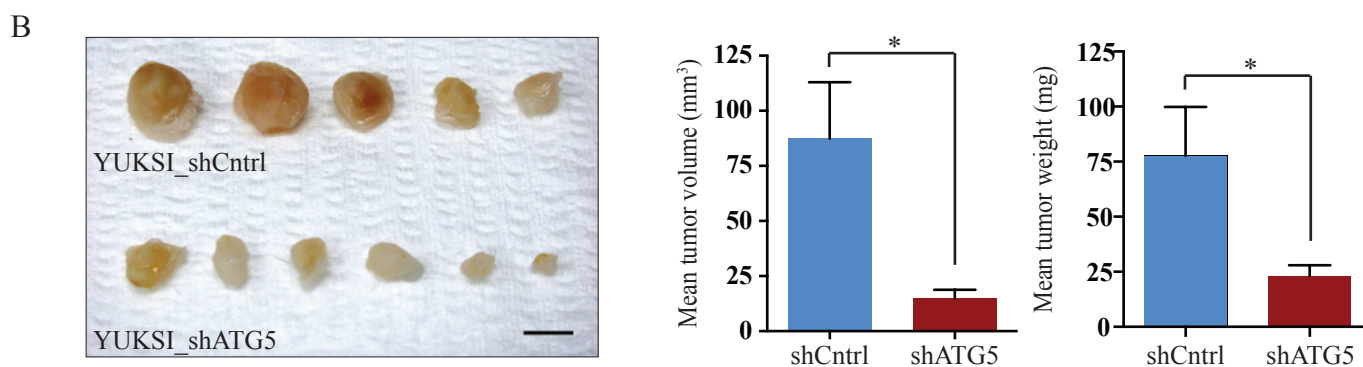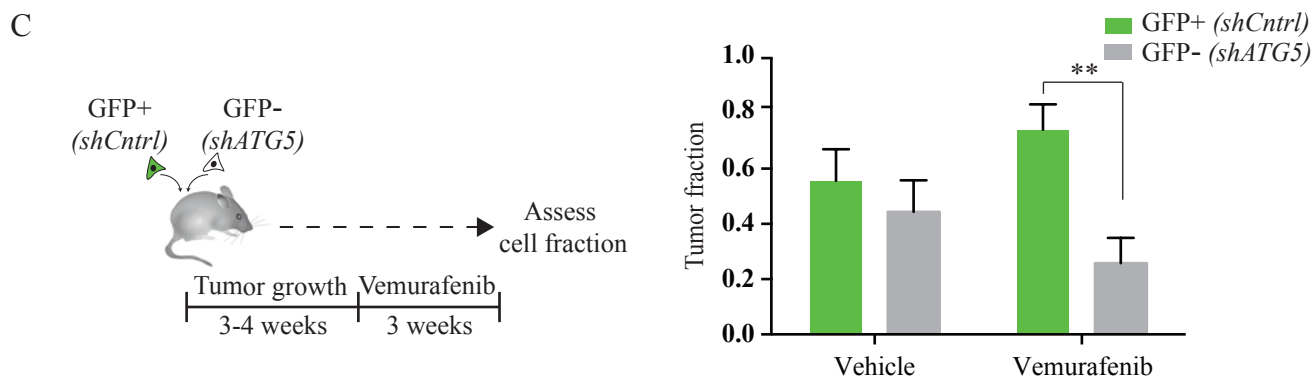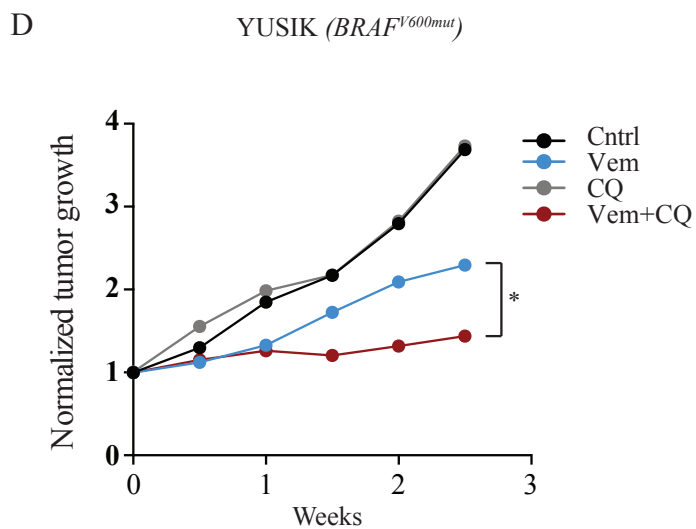

Supplement: NIHMS984206-supplement-4-6.pdf [file NIHMS984206-supplement-4-6.pdf]
